# Supplementary material for: Engineering microglia as intraoperative optical imaging agent vehicles potentially for fluorescence-guided surgery in gliomas
Source: Royal Society of Chemistry journal article supplement (doi:10.1039/c9bm01388a), 2019-11-04
Supplement: c9bm01388a1.pdf [file c9bm01388a1.pdf]

**Supporting Information to:**

**Engineering microglia as intraoperative optical imaging agent  
vehicles potentially for fluorescence-guided surgery in gliomas**

*Ling Guo<sup>a</sup>, Xiaochen Zhang<sup>a</sup>, Runxiu Wei<sup>a</sup>, Gaojie Li<sup>a</sup>, Bingzhi Sun<sup>a</sup>, Hongbo Zhang<sup>b</sup>, Dan Liu<sup>a</sup>,*

*Cuifeng Wang<sup>\*a</sup>, Min Feng<sup>\*a</sup>*

<sup>a</sup> School of Pharmaceutical Sciences, Sun Yat-sen University, University Town, Guangzhou,  
510006, P.R. China

<sup>b</sup> Department of Neurosurgery, Zhujiang Hospital, Southern Medical University, Guangzhou  
510282, P.R. China.

\*Corresponding authors: Tel.: +8620 39943073; fax: +8620 39943073

Email address: wangcf6@mail.sysu.edu.cn and fengmin@mail.sysu.edu.cn

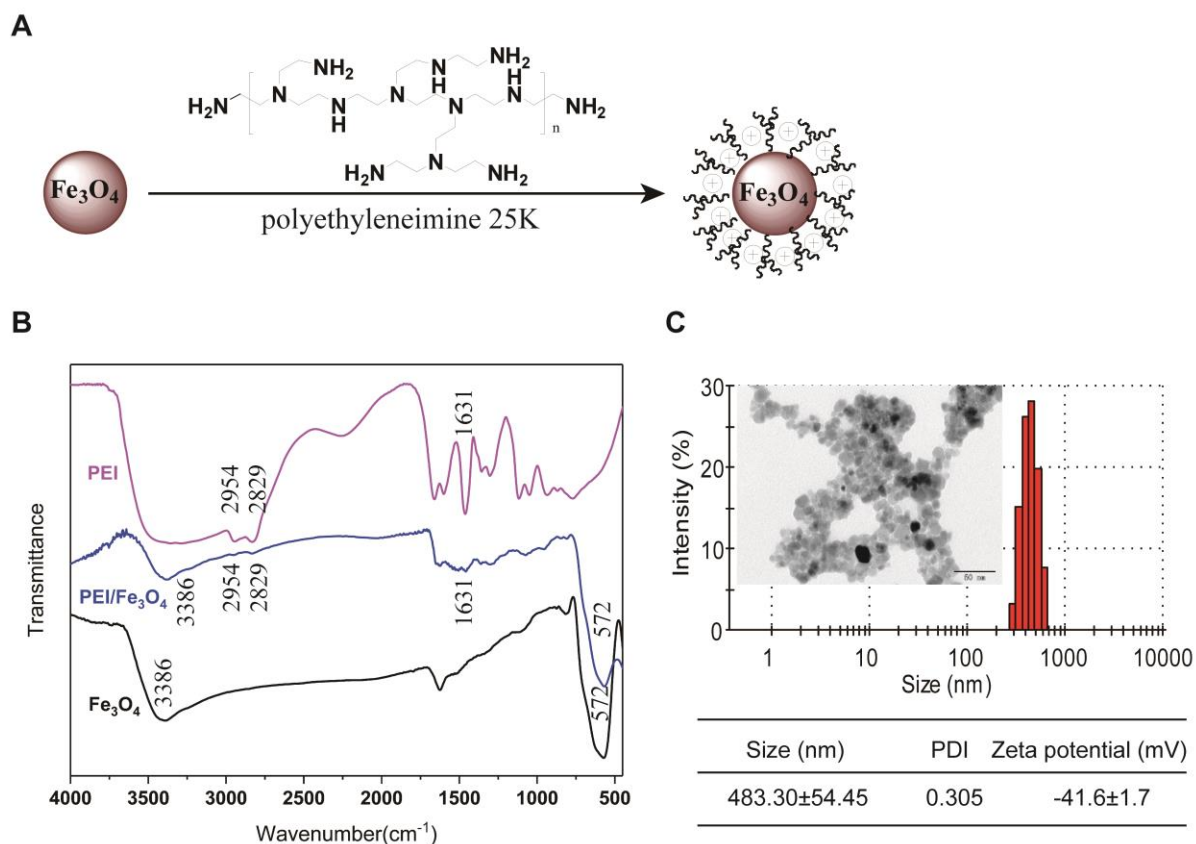

**Figure S1.** Characterization of polyethyleneimine 25K coated iron oxide nanoparticles (PEI/Fe<sub>3</sub>O<sub>4</sub>). (A) Schematic depiction of the preparation of PEI/Fe<sub>3</sub>O<sub>4</sub>. (B) FTIR spectra of Fe<sub>3</sub>O<sub>4</sub>, PEI and PEI/Fe<sub>3</sub>O<sub>4</sub>. The three peaks characteristic of PEI (2954 cm<sup>-1</sup>, 2829 cm<sup>-1</sup>, 1631 cm<sup>-1</sup>) indicate immobilization of the PEI on the Fe<sub>3</sub>O<sub>4</sub> surface. (C) DLS size distribution and zeta potential of PEI/Fe<sub>3</sub>O<sub>4</sub>. The TEM micrograph shown on the figure inset. Scale bar: 50 nm.

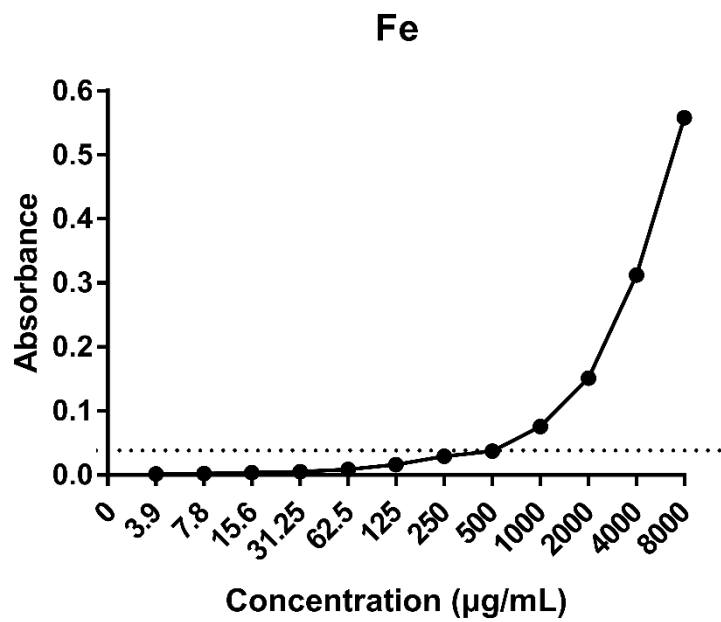

**Figure S2.** The variation in absorbance of CIONPs.

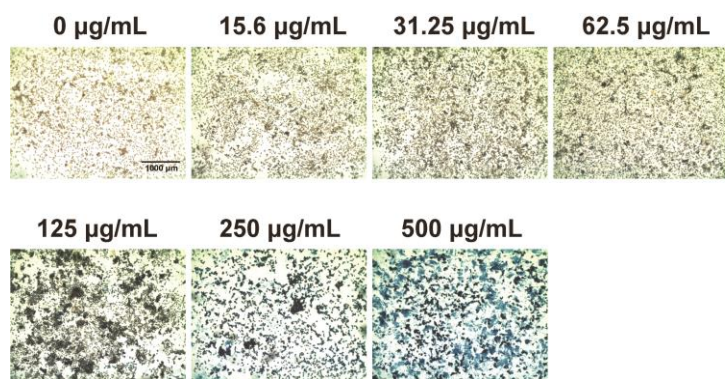

**Figure S3.** Intracellular CIONPs nanoparticles visualized by Prussian blue staining at 48 h.

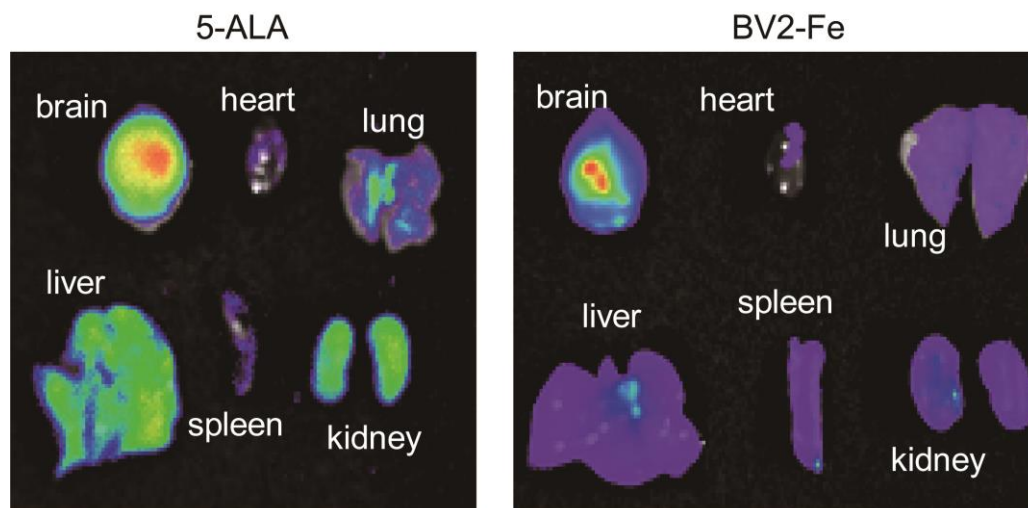

**Figure S4.** *Ex vivo* DiD fluorescence images of excised organs, including GBM-bearing brains, from mice sacrificed at 8 h after oral administration of 5-ALA or after internal carotid artery injection of BV2-Fe.
